# Supplementary material for: Loss of ABHD5 promotes the aggressiveness of prostate cancer cells
Source: PubMed Central journal article supplement (PMC5638841; doi:10.1038/s41598-017-13398-w), 2017-10-12

## **Loss of ABHD5 promotes the aggressiveness of prostate cancer cells**

Guohua Chen<sup>1</sup>, Guoli Zhou<sup>2</sup>, Siddhesh Aras<sup>3</sup>, Zhenhui He<sup>4</sup>, Stephanie Lucas<sup>1</sup>, Izabela Podgorski<sup>5</sup>, Wael Skar<sup>1</sup>, James G. Granneman<sup>3</sup> and Jian Wang<sup>1,6,\*</sup>

Department of Pathology<sup>1</sup>, Center for Molecular Medicine and Genetics<sup>3</sup>, Department of Pharmacology<sup>5</sup>, and Cardiovascular Research Institute<sup>6</sup>, Wayne State University, Detroit, MI 48201 USA

<sup>2</sup> Biomedical Research Informatics Core, Clinical and Translational Sciences Institute, Michigan State University, East Lansing, MI 48824 USA

<sup>4</sup> Department of Laboratory Medicine, Foshan University Medical College, Foshan, Guangdong 528000, China

### **\* To whom correspondence should be addressed:**

Email: [jianwang@med.wayne.edu](mailto:jianwang@med.wayne.edu)

Phone: 313-577-9433

Fax: 313-972-8025

**Supplementary Figure 1. Effects on phospho-AMPK $\alpha$  and p53 protein expression by ABHD5 knockdown in LNCaP cells.**

Levels of phospho-AMPK $\alpha$ , p53 and  $\beta$ -actin in the LNCaP cells with or without ABHD5 knockdown were analyzed by Western blotting.

**Supplementary Figure 2. Negligible effects on EMT marker expression and cell invasion by ABHD5 knockdown in PC3 cells.**

A. Levels of ABHD5, E-Cadherin, Snail and  $\beta$ -actin analyzed by Western Blotting.

B. Cell invasion determined by Boyden Chamber Transwell assay.

Supplementary Figure 1

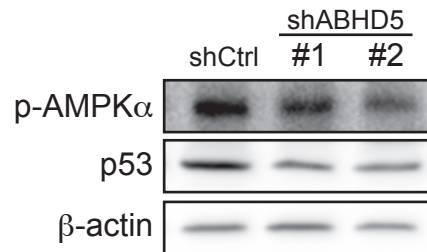

**A**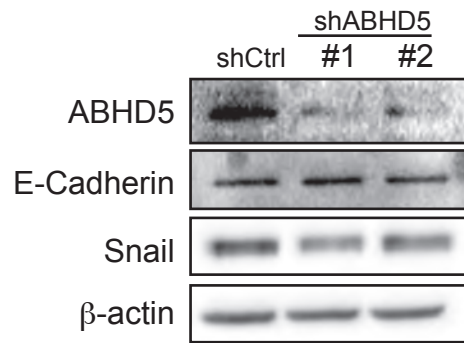**B**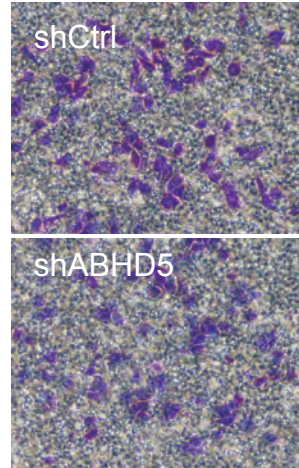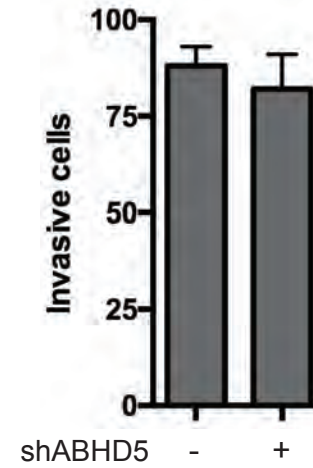

Supplement: 41598_2017_13398_MOESM1_ESM.pdf [file 41598_2017_13398_MOESM1_ESM.pdf]
